# Supplementary material for: Zn2SiO4urchin-like microspheres: controlled synthesis and application in lithium-ion batteries
Source: Royal Society of Chemistry journal article supplement (doi:10.1039/c4ce00479e), 2014-01-01
Supplement: c4ce00479e1.pdf [file c4ce00479e1.pdf]

## Supporting Information

### Zn<sub>2</sub>SiO<sub>4</sub> urchin-like microspheres: controlled synthesis and application in lithium-ion batteries

Shaoyan Zhang<sup>\*a</sup>, Lei Ren<sup>a</sup>, and Shengjie Peng<sup>\*b</sup>

<sup>a</sup> College of Chemical Engineering, Shijiazhuang University, Hebei Province, Shijiazhuang, 050035, China. Tel: +86-311-66617326; E-mail: zsyedu@hotmail.com

<sup>b</sup> School of Materials Science and Engineering, Nanyang Technological University, Singapore, 639798, Singapore. Tel: +65-68725563; E-mail: sjpeng@ntu.edu.sg

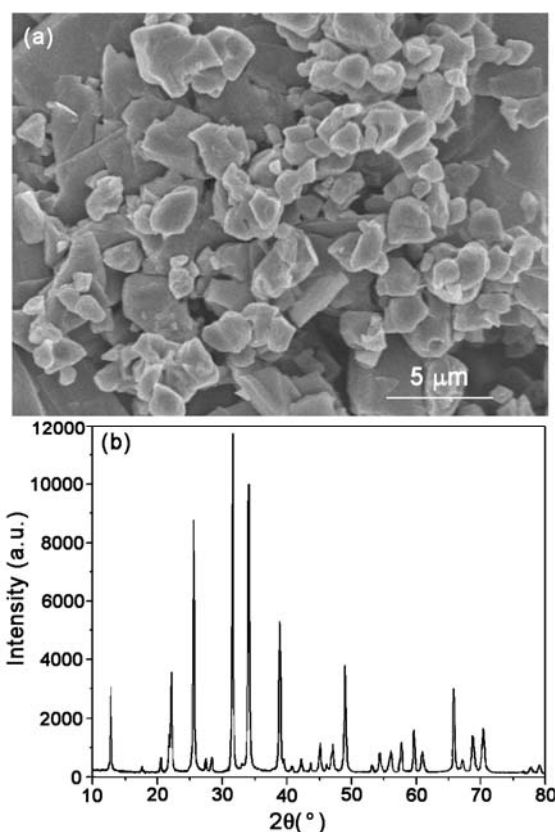

Fig. S1. FESEM image (a) and XRD pattern (b) of the Zn<sub>2</sub>SiO<sub>4</sub> bulk particles.
